# Supplementary material for: One-Week High-Dose β-Alanine Loading Improves World Tour Cyclists’ Time-Trial Performance
Source: MDPI journal article supplement (doi:10.3390/nu13082543), 2021-07-25
Supplement: s1 [file s1]

A RANDOMISED DOUBLE-BLIND CLINICAL TRIAL TO ANALYSE THE EFFICACY OF SHORT-TERM  
β-ALANINE SUPPLEMENTATION IN PERFORMANCE OUTCOMES OF ROAD PROFESSIONAL  
ENDURANCE CYCLISTS

DATE: 23 / 01 / 2020

CODE: \_\_\_\_

**SENSATION INTENSITY: VISUAL ANALOGUE SCALE (VAS)**

Mark a vertical line according to closest perceived intensity **at this moment**. An absence of any unusual sensation corresponds to *No unusual sensation* and a mark of 0 and should coincide with the vertical line to the left and *Most intense sensation* corresponds to a mark of 10.

No unusual  
sensation



Most  
intense  
sensation

**QUALITATIVE DESCRIPTION**

From the following words, please mark or circle the ones that better describes the current sensation (if no sensation leave it blank).

Pins-and-needles

Itching

Other:

Tickling

Numbness

---

---

---

Shiver

Pain

Please describe in detail any other side effect of feeling not previously mentioned.

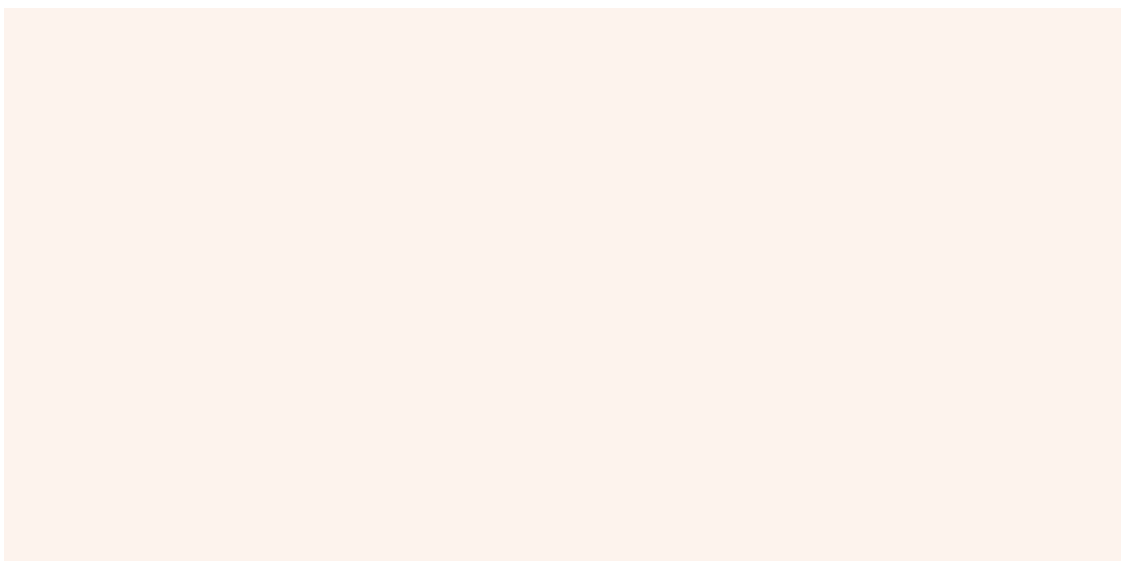

BASELINE

PARESTHESIA TEST

A RANDOMISED DOUBLE-BLIND CLINICAL TRIAL TO ANALYSE THE EFFICACY OF SHORT-TERM  
β-ALANINE SUPPLEMENTATION IN PERFORMANCE OUTCOMES OF ROAD PROFESSIONAL  
ENDURANCE CYCLISTS

DATE: 24 / 01 / 2020

CODE: \_\_\_\_

**SENSATION INTENSITY: VISUAL ANALOGUE SCALE (VAS)**

Mark a vertical line according to the **highest intensity perceived during the first day**.  
An absence of any unusual sensation corresponds to *No unusual sensation* and a mark of  
0 and should coincide with the vertical line to the left and *Most intense sensation*  
corresponds to a mark of 10.

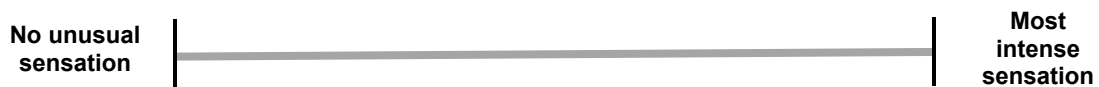

**QUALITATIVE DESCRIPTION**

From the following words, please mark or circle the ones that better describes the current sensation (if no sensation leave it blank).

|                  |          |                                   |
|------------------|----------|-----------------------------------|
| Pins-and-needles | Itching  | Other:<br>_____<br>_____<br>_____ |
| Tickling         | Numbness |                                   |
| Shiver           | Pain     |                                   |
|                  |          |                                   |

**Please describe in detail any other side effect of feeling not previously mentioned.**

**T.1 FIRST DAY**

**PARESTHESIA TEST**

A RANDOMISED DOUBLE-BLIND CLINICAL TRIAL TO ANALYSE THE EFFICACY OF SHORT-TERM  
β-ALANINE SUPPLEMENTATION IN PERFORMANCE OUTCOMES OF ROAD PROFESSIONAL  
ENDURANCE CYCLISTS

DATE: 31 / 01 / 2020

CODE: \_\_\_\_

**SENSATION INTENSITY: VISUAL ANALOGUE SCALE (VAS)**

Mark a vertical line according to the **highest intensity perceived during the last day**.  
An absence of any unusual sensation corresponds to *No unusual sensation* and a mark of  
0 and should coincide with the vertical line to the left and *Most intense sensation*  
corresponds to a mark of 10.

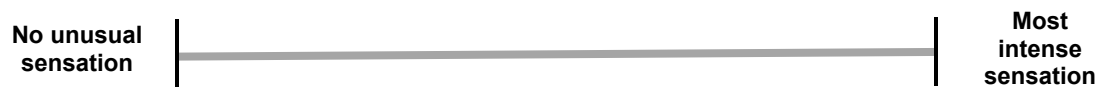

**QUALITATIVE DESCRIPTION**

From the following words, please mark or circle the ones that better describes the current sensation (if no sensation leave it blank).

|                  |          |                                   |
|------------------|----------|-----------------------------------|
| Pins-and-needles | Itching  | Other:<br>_____<br>_____<br>_____ |
| Tickling         | Numbness |                                   |
| Shiver           | Pain     |                                   |
|                  |          |                                   |

**Please describe in detail any other side effect of feeling not previously mentioned.**

**T.2 LAST DAY**

**PARESTHESIA TEST**
